# Supplementary material for: Electrochemically Stable Rechargeable Lithium–Sulfur Batteries Equipped with an Electrospun Polyacrylonitrile Nanofiber Film
Source: MDPI journal article supplement (doi:10.3390/polym15061460), 2023-03-15
Supplement: s1 [file s1]

## Supporting Figures

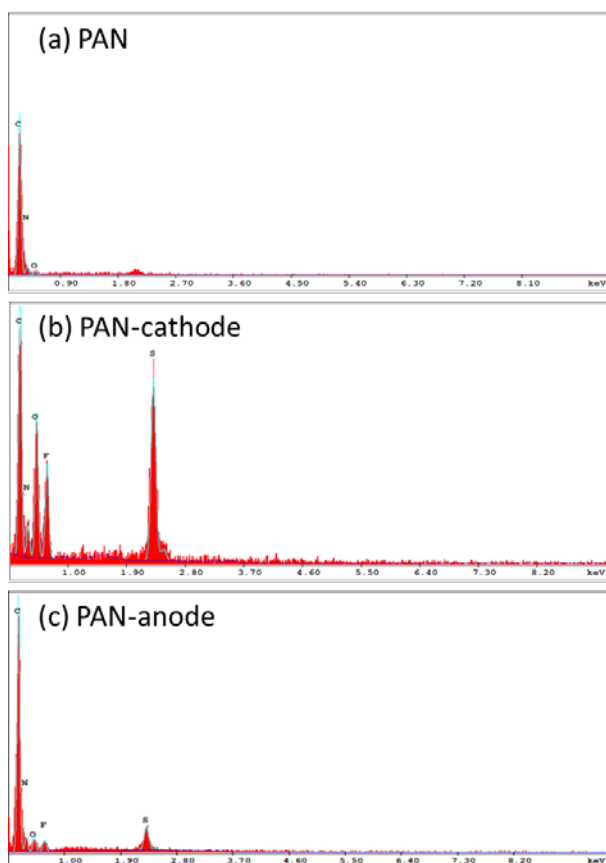

Figure S1. Energy-dispersive X-ray spectroscopy elemental analysis of (a) an electrospun polyacrylonitrile (PAN) nanofiber film, (b) a cathode-facing cycled polyacrylonitrile film, and (c) an anode-facing cycled polyacrylonitrile film.

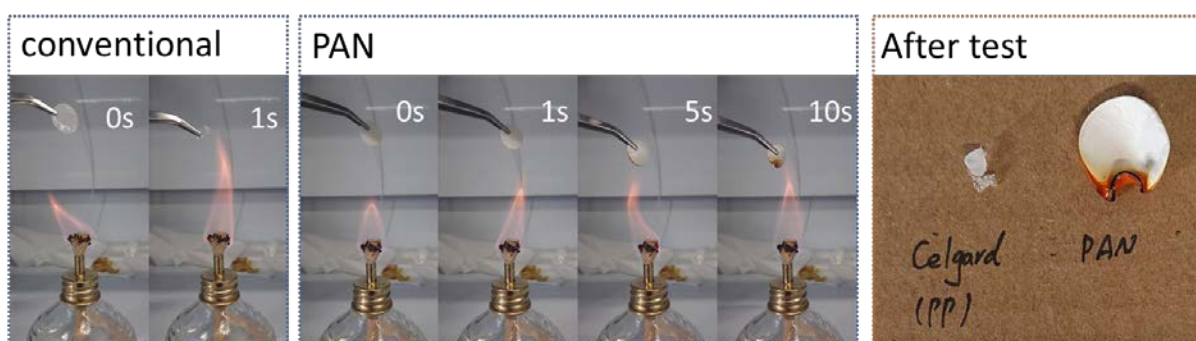

Figure S2. Flammability testing of conventional (polypropylene (PP)) and polyacrylonitrile (PAN) film separators.

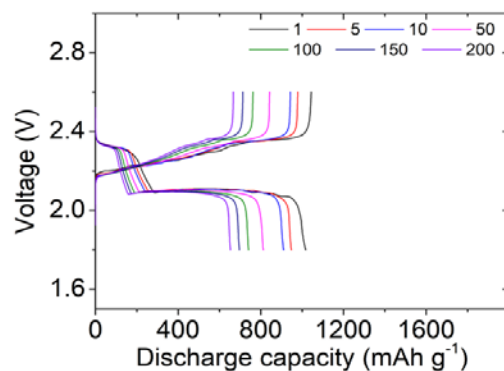

Figure S3. Discharge-charge voltage profiles of a lithium-sulfur cell equipped with a polyacrylonitrile film and cycled at C/20.

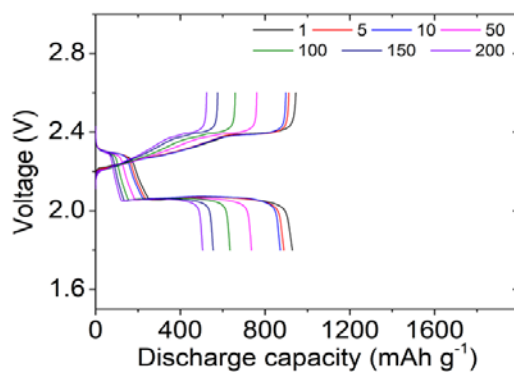

Figure S4. Discharge-charge voltage profiles of a lithium-sulfur cell equipped with a polyacrylonitrile film and cycled at C/10.

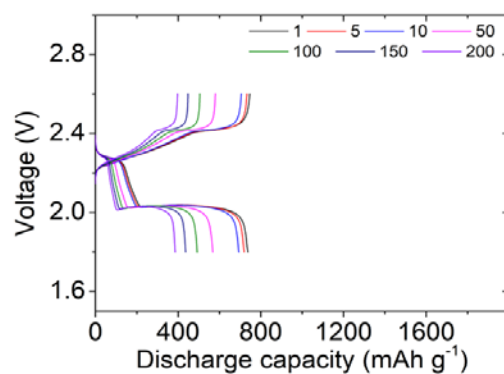

Figure S5. Discharge-charge voltage profiles of a lithium-sulfur cell equipped with a polyacrylonitrile film and cycled at C/5.

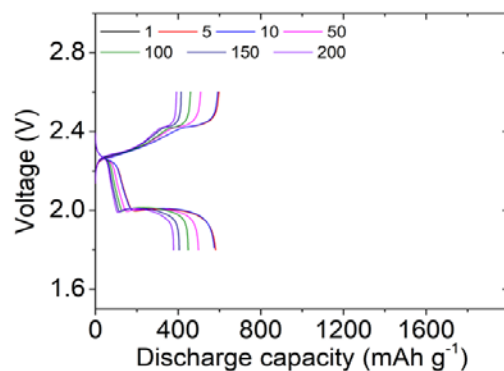

Figure S6. Discharge-charge voltage profiles of a lithium-sulfur cell equipped with a polyacrylonitrile film and cycled at  $C/3$ .

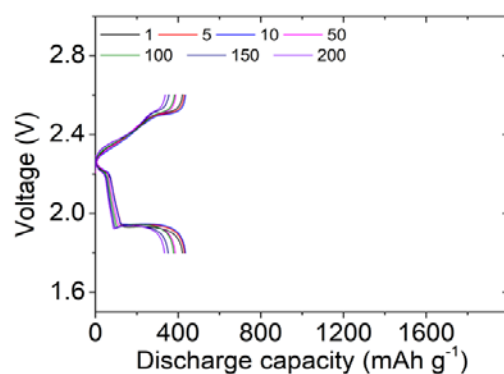

Figure S7. Discharge-charge voltage profiles of a lithium-sulfur cell equipped with a polyacrylonitrile film and cycled at  $C/2$ .

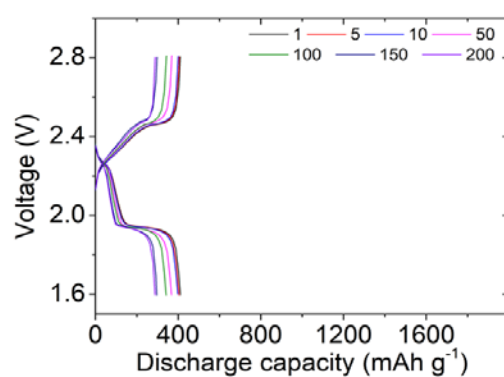

Figure S8. Discharge-charge voltage profiles of a lithium-sulfur cell equipped with a polyacrylonitrile film and cycled at  $1C$ .

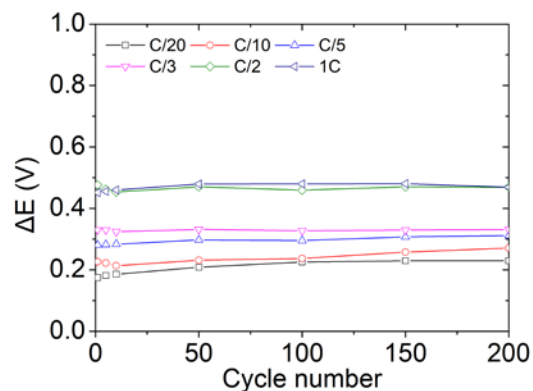

Figure S9. Hysteresis between charge and discharge processes in a lithium–sulfur cell equipped with a polyacrylonitrile film at various cycling rates for 200 cycles.

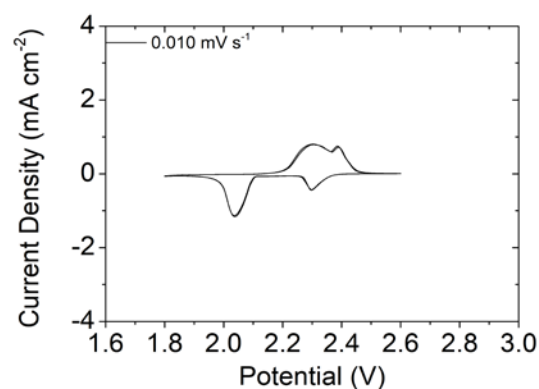

Figure S10. Cyclic voltammetry analysis at  $0.010 \text{ mV s}^{-1}$  of a lithium–sulfur cell equipped with a polyacrylonitrile film.

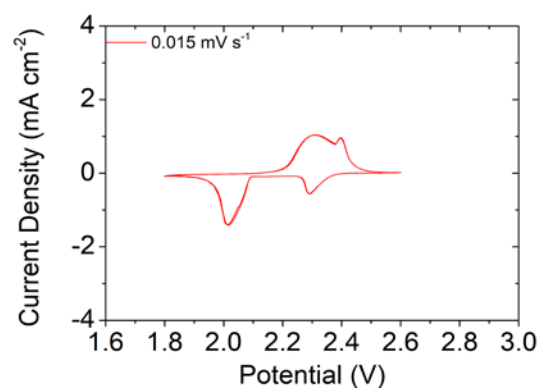

Figure S11. Cyclic voltammetry analysis at  $0.015 \text{ mV s}^{-1}$  of a lithium–sulfur cell equipped with a polyacrylonitrile film.

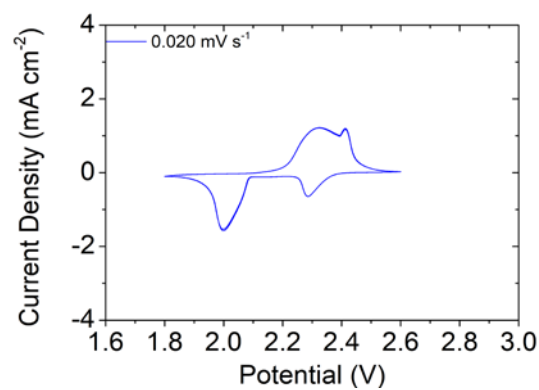

Figure S12. Cyclic voltammetry analysis at 0.020 mV s<sup>-1</sup> of lithium–sulfur cell equipped with a polyacrylonitrile film.

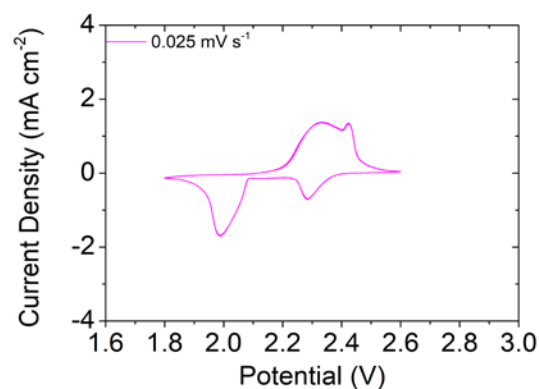

Figure S13. Cyclic voltammetry analysis at 0.025 mV s<sup>-1</sup> of a lithium–sulfur cell equipped with a polyacrylonitrile film.

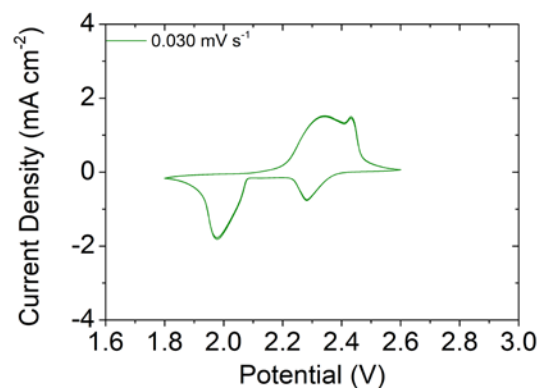

Figure S14. Cyclic voltammetry analysis at 0.030 mV s<sup>-1</sup> of a lithium–sulfur cell equipped with a polyacrylonitrile film.

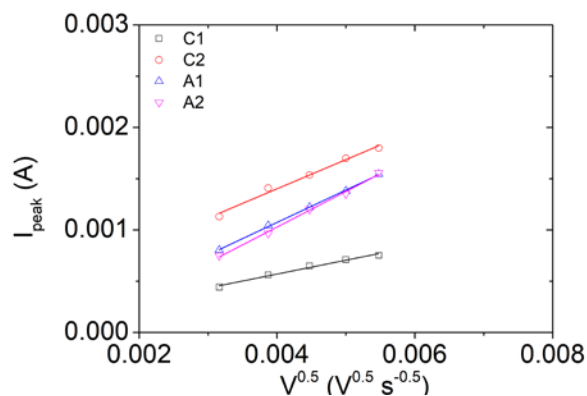

Figure S15. Lithium-ion diffusion coefficient profiles of the cyclic voltammetry analysis at various rates using a lithium–sulfur cell equipped with a polyacrylonitrile film.

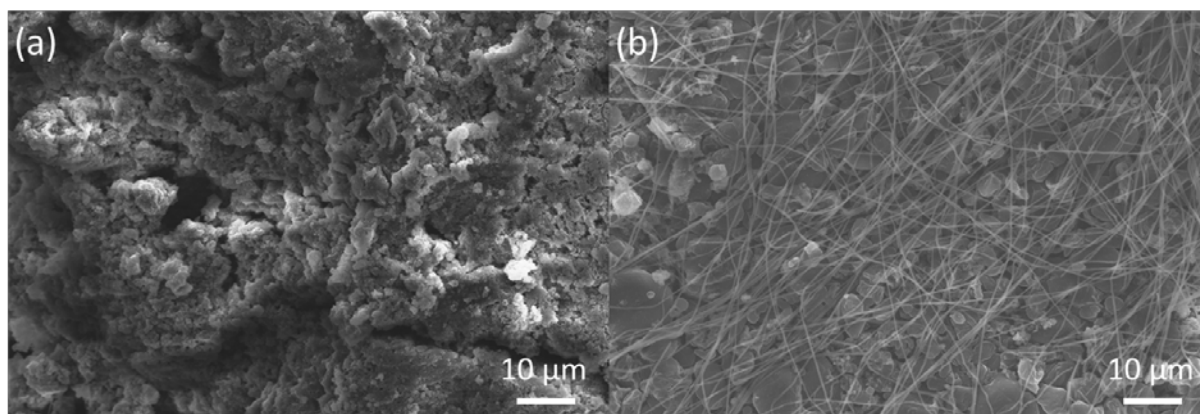

Figure S16. Morphology of a lithium-metal electrode after undergoing stripping and plating reactions from a cell equipped with (a) a conventional separator or (b) a polyacrylonitrile film separator.

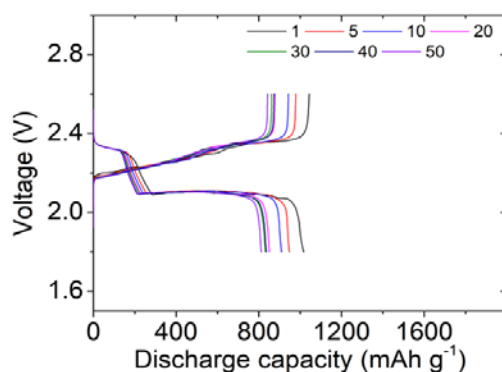

Figure S17. Discharge–charge voltage profiles of a lithium–sulfur cell (with a sulfur loading and content of  $4 \text{ mg cm}^{-2}$  and 50 wt%, respectively) equipped with a polyacrylonitrile film.

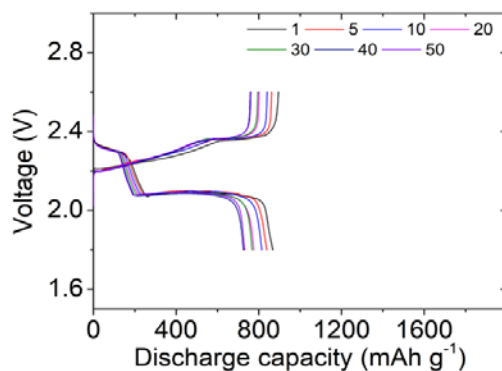

Figure S18. Discharge-charge voltage profiles of a lithium-sulfur cell (with a sulfur loading and content of  $8 \text{ mg cm}^{-2}$  and 68 wt%, respectively) equipped with a polyacrylonitrile film.

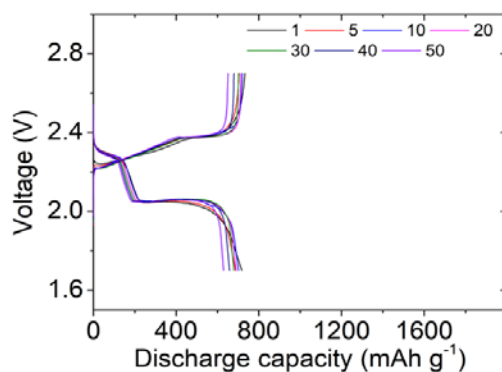

Figure S19. Discharge-charge voltage profiles of a lithium-sulfur cell (with a sulfur loading and content of  $12 \text{ mg cm}^{-2}$  and 75 wt%, respectively) equipped with a polyacrylonitrile film.

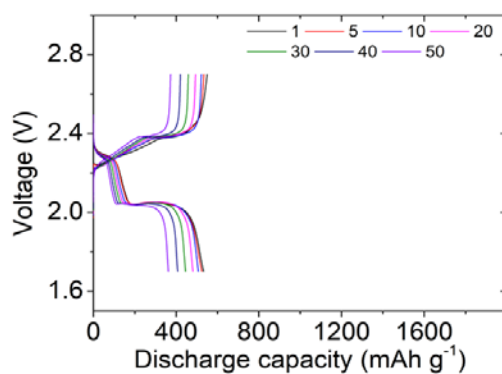

Figure S20. Discharge-charge voltage profile of a lithium-sulfur cell (with a sulfur loading and content of  $16 \text{ mg cm}^{-2}$  and 80 wt%, respectively) equipped with a polyacrylonitrile film.

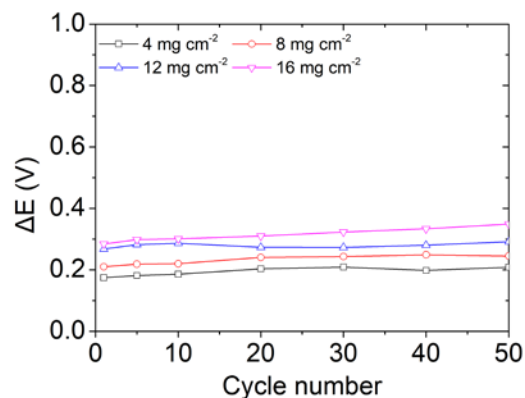

Figure S21. Hysteresis between charge and discharge processes in high-sulfur-loading lithium–sulfur cells equipped with a polyacrylonitrile film.

### Supporting Tables

Table S1. Analysis of the sulfur cathodes with the electrospun separators reported recently.

|          | A        | B   | C   | D             | E    | F    |
|----------|----------|-----|-----|---------------|------|------|
| [49]     | S/KB     | 60  | 2   | PAN/PAA       | 1.3  | 2.7  |
| [34]     | S/KB     | 70  | 2   | PAN–PDAAQ     | 2.3  | 4.8  |
| [50]     | rGO-S    | N/A | 7.7 | T@LPP         | 7.8  | 16.4 |
| [51]     | S/C      | N/A | 2.2 | PEI/PAN       | 1.6  | 3.4  |
| [52]     | S/CNF    | N/A | 1.2 | F-Cu-BTC-PMIA | 1.5  | 3.2  |
| [53]     | S/C      | 60  | 2   | CPP@PVA/ZIF-8 | 2.5  | 5.2  |
| [54]     | C@S      | 73  | 1.1 | T@LPP         | 0.8  | 1.7  |
| [42]     | S        | 60  | 2   | C-PVA/PAA-Li  | 1.6  | 3.4  |
| [55]     | S/C      | N/A | 3   | ZIF@T-PVDF    | 1.9  | 4.1  |
| [56]     | S/MWCNT  | 53  | 1.2 | PHB/Co-CNF    | 1.14 | 2.4  |
| Our work | pristine | 80  | 16  | PAN           | 8.6  | 18.1 |

A: Cathode, B: sulfur content [wt%], C: sulfur loading [mg cm<sup>-2</sup>], D: Electrospinning separator, E: areal capacity [mA·h cm<sup>-2</sup>], F: energy density [mW·h cm<sup>-2</sup>].



### Supporting References

- [49] Zhu, X.; Ouyang, Y.; Chen, J.; Zhu, X.; Luo, X.; Lai, F.; Zhang, H.; Miao, Y.-E.; Liu, T. *In Situ* Extracted Poly(acrylic acid) Contributing to Electrospun Nanofiber Separators with Precisely Tuned Pore Structures for Ultra-stable Lithium–Sulfur Batteries. *J. Mater. Chem. A* **2019**, *7*, 3253–3263.
- [34] Kiai, M.S.; Eroglu, O.; Kizil, H. Electrospun Nanofiber Polyacrylonitrile Coated Separators to Suppress the Shuttle Effect for Long-life Lithium–Sulfur Battery. *J. Appl. Polym. Sci.* **2019**, *137*, 48606.
- [50] Zhou, C.; He, Q.; Li, Z.; Meng, J.; Hong, X.; Li, Y.; Zhao, Y.; Xu, X.; Mai, L. A Robust Electrospun Separator Modified with In Situ Grown Metal-organic Frameworks for Lithium-Sulfur Batteries. *Chem. Eng. J.* **2020**, *395*, 124979.
- [51] Hu, M.; Ma, Q.; Yuan, Y.; Pan, Y.; Chen, M.; Zhang, Y.; Long, D. Grafting Polyethyleneimine on Electrospun Nanofiber Separator to Stabilize Lithium Metal Anode for Lithium Sulfur Batteries. *Chem. Eng. J.* **2020**, *388*, 124258.
- [52] Deng, N.; Wang, L.; Feng, Y.; Liu, M.; Li, Q.; Wang, G.; Zhang, L.; Kang, W.; Cheng, B.; Liu, Y. Co-based and Cu-based MOFs Modified Separators to Strengthen the Kinetics of Redox Reaction and inhibit Lithium-dendrite for Long-life Lithium-Sulfur Batteries. *Chem. Eng. J.* **2020**, *388*, 124241.
- [53] Zheng, S.; Zhu, X.; Ouyang, Y.; Chen, K.; Chen, A.-L.; Fan, X.; Miao, Y.-E.; Liu, T.; Xie, Y. Metal–Organic Framework Decorated Polymer Nanofiber Composite Separator for Physiochemically Shielding Polysulfides in Stable Lithium–Sulfur Batteries. *Energy Fuels* **2021**, *35*, 19154–19163.
- [54] Lan, F.; Zhang, H.; Fan, J.; Xu, Q.; Li, H.; Min, Y. Electrospun Polymer Nanofibers with TiO<sub>2</sub>@NiCo-LDH as Efficient Polysulfide Barriers for Wide-Temperature-Range Li–S Batteries. *ACS Appl. Mater. Interfaces* **2021**, *13*, 2734–2744.

- [42] Zhou, C.; Wang, J.; Zhu, X.; Chen, K.; Ouyang, Y.; Wu, Y.; Miao, Y.-E; Liu, T. A Dual-functional Poly(vinyl alcohol)/Poly(lithium acrylate) Composite Nanofiber Separator for Ionic Shielding of Polysulfides Enables High-rate and Ultra-stable Li-S Batteries. *Nano Research* **2021**, *14*, 1541-1550.
- [55] Fang, Y.; Wang, G.; Kang, W.; Deng, N.; Cheng, B. Taming Polysulfides and Facilitating Lithium-ion Migration: Novel Electrospinning MOFs@PVDF-based Composite Separator with Spiderweb-like Structure for Li-S Batteries. *Electrochim. Acta* **2021**, *365*, 137344.
- [56] Liang, X.; Wang, L.; Wang, Y.; Liu, Y.; Sun, Y.; Xiang, H. Constructing Multi-functional Composite Separator of PVDF-HFP/h-BN Supported Co-CNF Membrane for Lithium–Sulfur Batteries. *Sustain. Energy Fuels* **2022**, *6*, 440–448.
